# Supplementary material for: Design and assembly of an aqueous red CdTe QD-LED: major factors to fabricate aqueous QD-LEDs
Source: Royal Society of Chemistry journal article supplement (doi:10.1039/c6ra15558h), 2016-01-01
Supplement: c6ra15558h1.pdf [file c6ra15558h1.pdf]

## Supporting Information

### **Design and Assembly of aqueous red CdTe QD-LED: Major factors to fabricate aqueous QD-LEDs**

Jinhua Du<sup>1</sup>, Shuhong Xu<sup>1\*</sup>, Chunlei Wang<sup>1</sup>, Jiangyong Pan<sup>2</sup>, Jing Chen<sup>2</sup>, Li Zhu<sup>2</sup>,  
Changgui Lv<sup>2</sup>, Yiping Cui<sup>1,\*</sup>

<sup>1</sup>Advanced Photonics Center, Southeast University, Nanjing 210096, Jiangsu, China

<sup>2</sup>Display Center, Southeast University, Nanjing 210096, Jiangsu, China

E-mail: [xush@seu.edu.cn](mailto:xush@seu.edu.cn); [cyp@seu.edu.cn](mailto:cyp@seu.edu.cn).

**Figure S1:** Cross-sectional scanning electron microscope image of the aqueous red CdTe QD-LED.

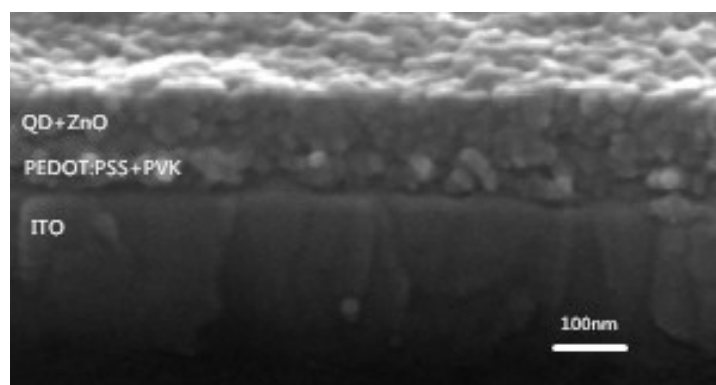

#### **The method of preparing QDs solution used in sample B**

The experimental steps in detail are as follows:

- (1) 14 mL CdCl<sub>2</sub> solution and 290 μL MPA were mixed in 26 mL DI water to make a kind of solvent.
- (2) The pH of the solvent was adjusted to 6.8 by adding NaOH solution.
- (3) 35 mL aqueous red CdTe QDs solution (4 × 10<sup>-3</sup> mol/L) was centrifuged, purified and re-dispersed in a 4 mL the solvent /Triton X-100 mixed solution with volume ratio of 2000:1.
- (4) The new CdTe QDs solution (0.035 mol/L) was the QDs solution used in sample B.
